# Supplementary material
Source: Royal Society of Chemistry journal article supplement (doi:10.1039/d6ta01356b)
Supplement: d6ta01356b1.pdf [file d6ta01356b1.pdf]

## Supplementary Information

# High-Rate Laminar Zn Plating in Aqueous Zinc Batteries: From S-PANI Grafted Bacterial Cellulose to Stable Metal Anode

Fatemeh Vahedizadeh<sup>a</sup>, Farzaneh Hekmat<sup>b\*</sup>, Saeed Shahrokhian<sup>a\*</sup>, Xiong Pu<sup>c</sup>, Jinliang Li<sup>d</sup>

*<sup>a</sup>Department of Chemistry, Sharif University of Technology, Tehran 11155–9516, Iran*

*<sup>b</sup>Department of Chemistry, Shahid Beheshti University, Tehran 1983969411, Iran*

*<sup>c</sup>Beijing Key Laboratory of High-Entropy Energy Materials and Devices, Beijing Institute of Nanoenergy and Nanosystems, Chinese Academy of Sciences, Beijing 101400, China*

*<sup>d</sup>Siyuan Laboratory, Guangdong Provincial Engineering Technology Research Center of Vacuum Coating Technologies and New Materials, Department of Physics, Jinan University, Guangzhou 510632, China*

---

Corresponding Authors: [f\\_hekmat@sbu.ac.ir](mailto:f_hekmat@sbu.ac.ir), [shahrokhian@sharif.edu](mailto:shahrokhian@sharif.edu)

## Experimental section

### Chemicals:

Commercially available zinc and copper foils, as well as carbon sheets, were purchased from Merck and Redox Kala, respectively. All reagents, including zinc sulfate heptahydrate ( $\text{ZnSO}_4 \cdot 7\text{H}_2\text{O}$ , 99.0%), hydrochloric acid ( $\text{HCl}$ , 37.0% w/w), aniline ( $\text{C}_6\text{H}_5\text{NH}_2$ , 99.5%), ammonium persulfate ( $(\text{NH}_4)_2\text{S}_2\text{O}_8$ , 98.0%), ethanol ( $\text{C}_2\text{H}_5\text{OH}$ , 99.8%), 1,2-dichloroethane ( $\text{C}_2\text{H}_4\text{Cl}_2$ , 99.0%), cobalt sulfate heptahydrate ( $\text{CoSO}_4 \cdot 7\text{H}_2\text{O}$ , 99.0%), copper sulfate hexahydrate ( $\text{CuSO}_4 \cdot 6\text{H}_2\text{O}$ , 99.0%), trisodium citrate dihydrate ( $\text{Na}_3\text{C}_6\text{H}_5\text{O}_7 \cdot 2\text{H}_2\text{O}$ , 99.0%), potassium ferricyanide ( $\text{K}_3[\text{Fe}(\text{CN})_6]$ , 99.0%), and chlorosulfonic acid ( $\text{HSO}_3\text{Cl}$ , 99.0 %) were also obtained from Merck and used without further purification. Deionized (DI) water was used throughout the experiment, which was supplied from the Zolalan water purification system.

### Material Characterization

Field emission scanning electron microscopy (FE-SEM) images were acquired using a TESCAN (MIRA 3 LMU) microscope. Thermal gravimetric analysis (TGA) curves were measured on an SDT Q600 V20.9 instrument in the range of 25-800 °C. X-ray diffraction (XRD) patterns were obtained with a Philips PW1730 diffractometer. Fourier-transform infrared (FTIR) spectra were measured on a Perkin-Elmer instrument in the range of 500-4000  $\text{cm}^{-1}$ . Atomic force microscopy (AFM) images were obtained using a VEECO CP-II microscope operated in non-contact-mode. Water contact angle (WCA) measurements were conducted using a CAG-20 contact angle meter.

### Electrochemical Measurements

Electrochemical performance of zinc-based cells, encompassing Zn||Zn symmetrical cells, Zn||Cu half cells, and Zn||PBA full cells, was evaluated using a pouch-type cell. Long-term cycling and rate capability tests were conducted on an Atom Lab (Ataei Company, Isfahan, Iran). The Zn||Zn symmetrical cells were assembled with either untreated Zn foil or BC/S-PANI@BC@Zn composite electrodes as both anode and cathode, paired with a 1 M  $\text{ZnSO}_4$  aqueous electrolyte and a Whatman filtration paper separator. For Zn||Cu half cells, the cathode was substituted with Cu foil, while retaining the 1 M  $\text{ZnSO}_4$  electrolyte and filtration paper separator. Zn||PBA full cells were constructed with a synthesized PBA cathode, a filtration paper separator, an electrolyte of 1

M ZnSO<sub>4</sub>, and either bare Zn or BC/S-PANI@BC@Zn as the anode. Electrochemical characterizations, including cyclic voltammetry (CV), electrochemical impedance spectroscopy (EIS), and linear scanning voltammetry (LSV), were performed using an AutoLab 204 instrument. EIS measurements spanned a frequency range of 10<sup>+6</sup> to 10<sup>-2</sup> Hz with an AC perturbation amplitude of 5 mV to assess impedance properties. Tafel polarization experiments were conducted in a three-electrode configuration, utilizing untreated Zn or BC/S-PANI@BC@Zn as the working electrode, a platinum foil counter electrode, and an Ag/AgCl reference electrode to investigate the electrochemical kinetics and corrosion characteristics.

Table S1. The xyz coordinates of the optimized structure for DFT calculation.

| Atom      | X           | Y           | Z           |
|-----------|-------------|-------------|-------------|
| <b>BC</b> |             |             |             |
| O         | -1.52619300 | 0.96141100  | -0.39304200 |
| C         | -3.58750100 | -0.02892900 | 0.50783600  |
| C         | -1.69021800 | -1.43266700 | -0.40632100 |
| C         | -3.20333600 | -1.33877700 | -0.18821900 |
| C         | -1.19484500 | -0.19171400 | -1.16233600 |
| C         | -2.94329300 | 1.15958800  | -0.23297500 |
| H         | -3.22166400 | -0.05735100 | 1.54736100  |
| H         | -1.20058400 | -1.47008600 | 0.57703900  |
| H         | -3.69962000 | -1.35562100 | -1.17188400 |
| H         | -1.67141600 | -0.14084700 | -2.15096200 |
| H         | -3.40739000 | 1.24968900  | -1.22714700 |
| O         | 0.17987700  | -0.17696300 | -1.45171600 |
| C         | 1.13457200  | -0.19077300 | -0.38403400 |
| O         | 3.12373900  | 0.98716800  | 0.41132300  |
| C         | 3.98416800  | -0.13414500 | 0.23785300  |
| C         | 2.05801900  | 1.03699400  | -0.55295200 |
| C         | 1.98475000  | -1.46237300 | -0.48548400 |
| H         | 4.40809800  | -0.11293200 | -0.78353000 |
| H         | 0.63976500  | -0.14265900 | 0.59188800  |
| C         | -3.11299200 | 2.47982600  | 0.50838000  |
| H         | -2.61375200 | 2.40921500  | 1.48749300  |
| H         | -4.17675000 | 2.65965500  | 0.67173200  |
| O         | -2.62160200 | 3.58488100  | -0.23617500 |
| H         | -1.68899100 | 3.42135400  | -0.43207800 |
| O         | -4.98732800 | 0.20718800  | 0.48763200  |
| C         | -5.73680800 | -0.39739000 | 1.54132000  |
| H         | -5.71080700 | -1.48907700 | 1.47984100  |
| H         | -6.76260000 | -0.04034000 | 1.42640700  |
| H         | -5.35492400 | -0.08138300 | 2.52319900  |
| O         | -3.64881100 | -2.44381400 | 0.59133500  |

|   |             |             |             |
|---|-------------|-------------|-------------|
| H | -3.26105300 | -3.23569500 | 0.18798000  |
| O | -1.45191000 | -2.63382800 | -1.12103500 |
| H | -0.50767000 | -2.84502500 | -1.00255100 |
| H | 2.35829000  | -1.53806100 | -1.51757100 |
| O | 1.18723900  | -2.61321100 | -0.19140500 |
| H | 1.79209000  | -3.36771100 | -0.12071400 |
| H | 2.48383800  | 1.02011900  | -1.56860700 |
| C | 1.36246900  | 2.37683200  | -0.34209600 |
| H | 0.92977000  | 2.40794900  | 0.66827900  |
| H | 0.55707000  | 2.48030200  | -1.06949800 |
| O | 2.25390900  | 3.46255700  | -0.55266000 |
| H | 2.99271800  | 3.35415900  | 0.06199600  |
| O | 4.99701000  | -0.10310600 | 1.18832400  |
| C | 5.98851900  | 0.90709200  | 0.98426400  |
| H | 5.56400700  | 1.90697400  | 1.11693900  |
| H | 6.42797700  | 0.82299100  | -0.01860900 |
| H | 6.76070700  | 0.73617600  | 1.73560700  |
| H | 2.81412500  | -1.38852700 | 1.50590400  |
| C | 3.17558300  | -1.40942200 | 0.46794100  |
| O | 3.93816900  | -2.58837000 | 0.22694400  |
| H | 4.68144400  | -2.59942300 | 0.84622400  |

**BC-Zn**

|   |            |             |             |
|---|------------|-------------|-------------|
| O | 1.47766700 | -0.06966100 | -0.91204800 |
| C | 3.76815400 | 0.00458000  | 0.11445700  |
| C | 1.93108700 | 1.60830500  | 0.89206200  |
| C | 2.89592500 | 0.47347600  | 1.29755000  |
| C | 0.93918500 | 1.09024800  | -0.17314100 |
| C | 2.90259100 | -0.27225300 | -1.16025800 |
| H | 4.29860700 | -0.90860400 | 0.41800600  |
| H | 1.32409200 | 1.90597600  | 1.75412200  |
| H | 3.55517000 | 0.79759900  | 2.10474400  |
| H | 0.64480100 | 1.87177900  | -0.87063200 |

|   |             |             |             |
|---|-------------|-------------|-------------|
| H | 3.22265400  | 0.40279400  | -1.96090700 |
| O | -0.16739400 | 0.50574000  | 0.49441600  |
| C | -1.46228500 | 0.39182200  | -0.18312700 |
| O | -3.70311400 | 1.15849600  | -0.50121900 |
| C | -4.34381300 | 0.00383000  | 0.07877700  |
| C | -2.46870400 | 1.54743200  | 0.08917800  |
| C | -2.06662700 | -0.86936300 | 0.41622100  |
| H | -4.49075200 | 0.18279700  | 1.15982200  |
| H | -1.29631600 | 0.28473300  | -1.26136000 |
| C | 2.95474300  | -1.71045100 | -1.67161900 |
| H | 3.98893200  | -2.04801200 | -1.77446100 |
| H | 2.42826100  | -1.80630400 | -2.62451300 |
| O | 2.27886800  | -2.55004000 | -0.67367100 |
| H | 2.40503600  | -3.49227800 | -0.86219000 |
| O | 4.68361900  | 1.05581300  | -0.11143100 |
| C | 5.94343700  | 0.69771900  | -0.71672900 |
| H | 5.80417000  | 0.34284200  | -1.74465000 |
| H | 6.44908200  | -0.06520400 | -0.11472700 |
| H | 6.54051700  | 1.60882500  | -0.73025700 |
| O | 2.13364500  | -0.69954000 | 1.77070500  |
| H | 2.03558600  | -0.67707300 | 2.73476600  |
| O | 2.60691500  | 2.74704600  | 0.43051400  |
| H | 3.50386800  | 2.52981800  | 0.11979700  |
| H | -2.16266400 | -0.75015200 | 1.50216500  |
| O | -1.15237800 | -2.01064600 | 0.20966100  |
| H | -1.67572800 | -2.82635700 | 0.34507100  |
| H | -2.56297000 | 1.67942900  | 1.17847400  |
| C | -2.12085300 | 2.89205100  | -0.55011200 |
| H | -2.09673300 | 2.78493300  | -1.64319700 |
| H | -2.91873200 | 3.59629900  | -0.29339000 |
| O | -0.85812700 | 3.31356200  | -0.03849900 |
| H | -0.75757900 | 4.26848600  | -0.14945900 |
| O | -5.52091400 | -0.25273400 | -0.56766800 |
| C | -6.61744000 | 0.63977700  | -0.26950400 |

|               |             |             |             |
|---------------|-------------|-------------|-------------|
| H             | -6.80800600 | 0.65935800  | 0.80971700  |
| H             | -7.48269200 | 0.23105000  | -0.78960600 |
| H             | -6.40152100 | 1.64514400  | -0.63880900 |
| H             | -3.35445000 | -1.33138300 | -1.26461100 |
| C             | -3.42189100 | -1.20087400 | -0.17542200 |
| O             | -3.80700100 | -2.40289800 | 0.46474900  |
| H             | -4.67036900 | -2.69382100 | 0.13236900  |
| Zn            | 0.79007900  | -1.54438700 | 0.40032100  |
| <b>S-PANI</b> |             |             |             |
| C             | -5.61658200 | -1.47373200 | 0.03990600  |
| C             | -7.17036200 | 0.52541800  | 1.19340100  |
| C             | -5.23390700 | -0.13215400 | -0.11554300 |
| C             | -6.76095200 | -1.81777900 | 0.76194400  |
| C             | -7.53872200 | -0.81348500 | 1.34020000  |
| C             | -6.02501400 | 0.86202800  | 0.46853200  |
| H             | -7.03691700 | -2.86295700 | 0.84921300  |
| H             | -8.43171200 | -1.07822900 | 1.89721900  |
| H             | -5.73609400 | 1.90269300  | 0.34998800  |
| H             | -7.77452100 | 1.31037700  | 1.63760100  |
| N             | -4.08851000 | 0.22412600  | -0.92595800 |
| H             | -4.36981900 | 0.87618100  | -1.65359500 |
| H             | -3.90629100 | -1.46809900 | -2.09066200 |
| C             | -2.89596700 | 0.67813200  | -0.29198800 |
| C             | -0.47385600 | 1.55992900  | 0.86491100  |
| C             | -2.45894300 | 0.14773400  | 0.92968100  |
| C             | -2.11837900 | 1.65036000  | -0.93268600 |
| C             | -0.92499000 | 2.07921000  | -0.35701600 |
| C             | -1.26390700 | 0.59044900  | 1.49141300  |
| H             | -3.03280600 | -0.62515300 | 1.42590100  |
| H             | -2.43887600 | 2.09698100  | -1.86952000 |
| H             | -0.92788100 | 0.16561500  | 2.43311300  |
| N             | 0.73143500  | 2.06255100  | 1.48854300  |
| H             | 0.91095600  | 3.70866900  | 0.58351000  |

|   |             |             |             |
|---|-------------|-------------|-------------|
| H | 0.52185500  | 2.37555000  | 2.43343500  |
| C | 1.90593700  | 1.23618800  | 1.50467500  |
| C | 4.30021900  | -0.26149300 | 1.54643900  |
| C | 2.19823900  | 0.34763700  | 0.46497200  |
| C | 2.80132300  | 1.35421700  | 2.57838600  |
| C | 3.96707000  | 0.59848200  | 2.61114900  |
| C | 3.38203200  | -0.38685700 | 0.48500500  |
| H | 1.51460400  | 0.23512000  | -0.36837300 |
| H | 2.57765900  | 2.03131300  | 3.40012500  |
| H | 4.64489300  | 0.66857900  | 3.45560700  |
| H | 3.57831300  | -1.09287400 | -0.31513300 |
| N | 5.46026100  | -1.03018500 | 1.66965700  |
| C | 6.30295600  | -1.22821600 | 0.69817600  |
| C | 8.27941600  | -1.87486100 | -1.31181000 |
| C | 7.38096000  | -2.18888400 | 0.95596800  |
| C | 6.31394000  | -0.55674800 | -0.60834400 |
| C | 7.24279800  | -0.85953900 | -1.54048000 |
| C | 8.29292200  | -2.50856100 | 0.01487200  |
| H | 7.38439900  | -2.65001000 | 1.93882700  |
| H | 5.58084800  | 0.21866400  | -0.79944300 |
| H | 7.27393300  | -0.34997800 | -2.49871800 |
| H | 9.06833300  | -3.24421100 | 0.21641900  |
| N | 9.11402300  | -2.12555200 | -2.26815300 |
| H | 9.78969300  | -2.83939100 | -1.97778800 |
| S | -4.61012200 | -2.81725100 | -0.61972900 |
| O | -5.42234300 | -4.02218900 | -0.69504600 |
| O | -3.33228500 | -2.80907000 | 0.09345400  |
| O | -4.36148600 | -2.33941900 | -2.15391100 |
| S | 0.04304300  | 3.28499000  | -1.29027700 |
| O | 1.20897500  | 2.59464200  | -1.84039100 |
| O | 0.51667400  | 4.29630800  | -0.11785700 |
| O | -0.85392900 | 4.03671700  | -2.15960300 |

**S-PANI-Zn**

|   |             |             |             |
|---|-------------|-------------|-------------|
| C | 4.13179400  | -0.79675700 | -0.33675300 |
| C | 6.33235900  | 0.44577300  | 0.87429200  |
| C | 4.34744300  | 0.58590300  | -0.47896000 |
| C | 5.03990100  | -1.55148200 | 0.40960300  |
| C | 6.13626900  | -0.93062000 | 1.01273500  |
| C | 5.43729600  | 1.21007500  | 0.12046900  |
| H | 4.89312900  | -2.62305600 | 0.49971100  |
| H | 6.84111500  | -1.52564200 | 1.58414000  |
| H | 5.59992700  | 2.27733700  | -0.00583400 |
| H | 7.18728500  | 0.92657200  | 1.33810700  |
| N | 3.44023200  | 1.38938900  | -1.34521200 |
| H | 2.93314600  | 0.61836700  | -1.94460700 |
| H | 3.99398800  | 2.00177800  | -1.95099500 |
| C | 2.32894400  | 2.13023800  | -0.71301800 |
| C | -0.11832500 | 3.13674900  | 0.11882100  |
| C | 1.87629200  | 3.33732000  | -1.23912800 |
| C | 1.62086500  | 1.47258400  | 0.28424400  |
| C | 0.37432700  | 1.94419700  | 0.66946600  |
| C | 0.65230800  | 3.85595000  | -0.79209700 |
| H | 2.43122500  | 3.87081800  | -2.00565700 |
| H | 1.98364900  | 0.55068100  | 0.72009000  |
| H | 0.29522400  | 4.79704600  | -1.20203000 |
| N | -1.48802400 | 3.61531300  | 0.45172500  |
| H | -1.63038000 | 3.45874700  | 1.46567900  |
| H | -1.54408100 | 4.62673400  | 0.27796800  |
| C | -2.61305800 | 2.86777200  | -0.23279700 |
| C | -4.37096300 | 0.92767700  | -1.10583500 |
| C | -2.41498200 | 2.31326700  | -1.49238200 |
| C | -3.77517300 | 2.63182500  | 0.50152400  |
| C | -4.67900600 | 1.67117300  | 0.04686600  |
| C | -3.32698400 | 1.36281500  | -1.94356700 |
| H | -1.54488000 | 2.54692900  | -2.09575400 |

|    |             |             |             |
|----|-------------|-------------|-------------|
| H  | -3.95281100 | 3.12095200  | 1.45536500  |
| H  | -5.56733100 | 1.45422700  | 0.63012100  |
| H  | -3.17335500 | 0.86195500  | -2.89287700 |
| N  | -4.88010700 | -0.33935200 | -1.46739500 |
| C  | -4.69517400 | -1.33468700 | -0.65874500 |
| C  | -2.71149500 | -3.02003700 | 0.21963700  |
| C  | -4.57461000 | -2.67319500 | -1.28213100 |
| C  | -4.27370300 | -1.25897800 | 0.75693700  |
| C  | -3.31261300 | -2.09347300 | 1.18210400  |
| C  | -3.58266300 | -3.49494600 | -0.86137900 |
| H  | -5.14656200 | -2.87391500 | -2.18298100 |
| H  | -4.69475000 | -0.51553100 | 1.41979600  |
| H  | -2.91798400 | -2.05968800 | 2.19361100  |
| H  | -3.32635300 | -4.40453100 | -1.39742100 |
| N  | -1.42800100 | -3.28211400 | 0.30676000  |
| H  | -1.10261400 | -3.96442700 | -0.38035700 |
| S  | 2.70853500  | -1.65171900 | -1.06271000 |
| O  | 2.21130200  | -0.68994600 | -2.11285100 |
| O  | 1.71425800  | -1.68165600 | 0.10894800  |
| O  | 3.09704400  | -2.97891200 | -1.50342600 |
| S  | -0.63413900 | 0.79293800  | 1.62972100  |
| O  | -1.52116300 | 1.62672200  | 2.44880600  |
| O  | 0.28999100  | -0.17233200 | 2.32238100  |
| O  | -1.29341400 | -0.04277800 | 0.54383900  |
| Zn | -0.10716900 | -1.80037200 | 0.83198600  |

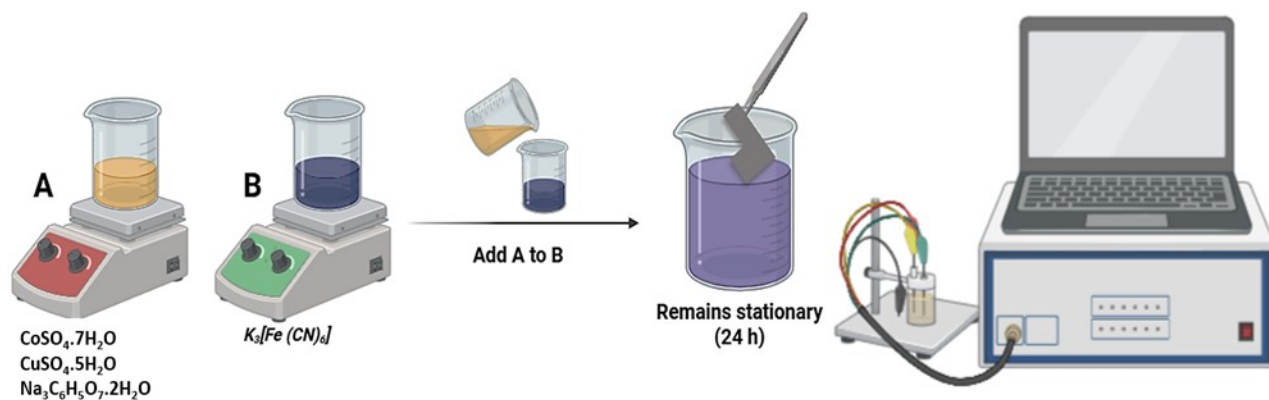

Figure S1. Schematic illustration of the synthesis procedure of PBA

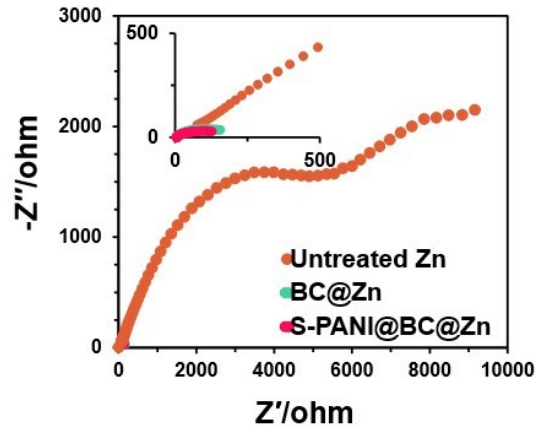

**Figure S2.** EIS curves of untreated Zn, BC@Zn, and S-PANI@BC@Zn after cycling stability.

### Calculation of Texture Coefficient (TC) from XRD Data

We have carried out a quantitative analysis of the XRD data by calculating the RTC values for the major diffraction planes, including (002), (101), and (100). The TC values were obtained using the standard formula:

$$TC(hkl) = \frac{I(hkl)/I_0(hkl)}{\frac{1}{n} \sum_n I(hkl)/I_0(hkl)}$$

where  $I(hkl)$  and  $I_0(hkl)$  represent the measured and standard intensity values, respectively. Based on the major Zn diffraction peaks ((002), (100), (101), (102), and (103)), the calculated RTC values reveal a distinct reconfiguration of the Zn growth orientation after surface modification. For the bare Zn electrode, the RTC values are calculated to be RTC (002) = 0.68, RTC (100) = 0.90, RTC (101) = 0.75, RTC (102) = 1.45, and RTC (103) = 1.24, indicating that the pristine Zn surface does not favor basal-plane deposition and instead exhibits relatively disordered crystal growth. In contrast, after introducing the S-PANI@BC interlayer, the crystallographic orientation undergoes a pronounced transition. The calculated RTC values become RTC (002) = 1.31, RTC (100) = 0.81, RTC (101) = 0.32, RTC (102) = 1.45, and RTC (103) = 1.12.

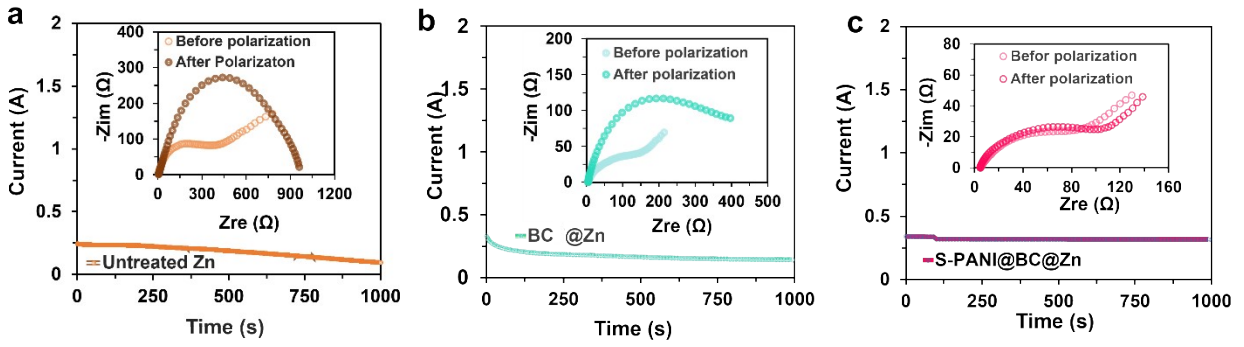

**Figure S3.**  $t_{Zn^{2+}}$  calculation from EIS & CA before and after polarization in Zn||Zn cells. (a) Untreated Zn, (b) BC@Zn, and (c) S-PANI@BC@Zn

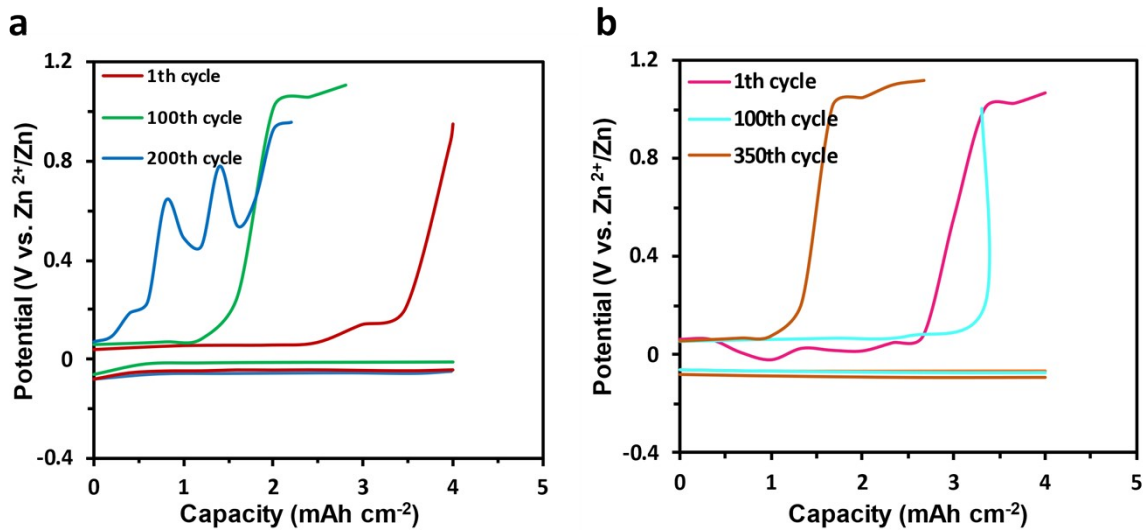

Figure S4. GCD of (a) untreated Zn, and (b) BC@Zn at different cycles at 20 mA cm<sup>-2</sup>/ 4 mAh cm<sup>-2</sup>

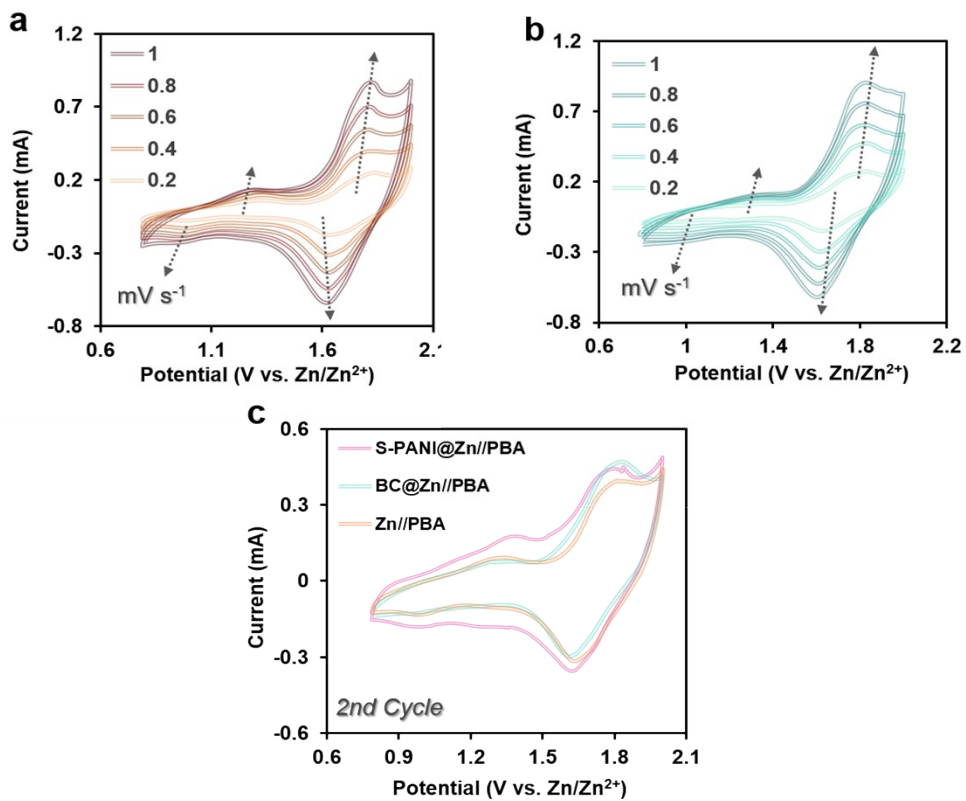

**Figure S5.** CV profiles of full batteries with PBA cathodes and (a) untreated Zn, and (b) BC@Zn anodes at scan rates from 0.2 to 1.0 mV s<sup>-1</sup>, and (c) comparison of different anodes with a scan rate of 0.5 mV s<sup>-1</sup>

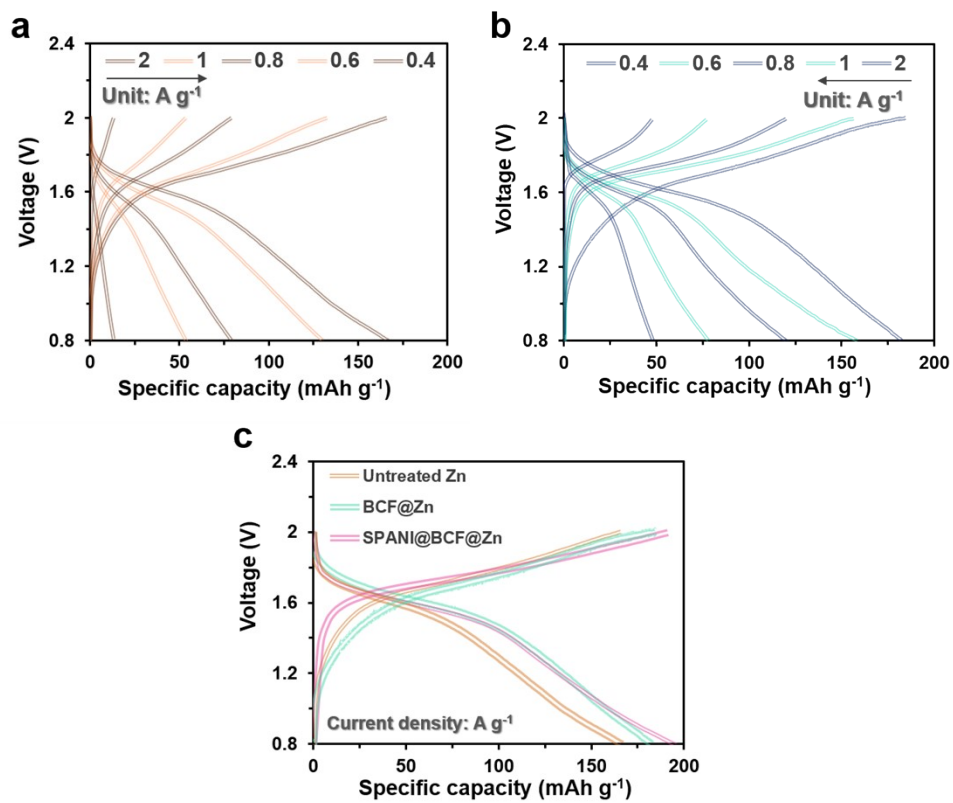

**Figure S6.** GCD profiles of full batteries with PBA cathodes and (a) untreated Zn, (b) BC@Zn anodes at various current densities, and (c) comparison of different anodes in 0.4 A g<sup>-1</sup>.

Table S2. Fitted parameters obtained from EIS analysis and equivalent circuit modeling of the different full batteries: a) untreated Zn||PBA, b) BC@Zn||PBA, and c) S-PANI@BC@Zn||PBA.

|                          |                |              |              |                |
|--------------------------|----------------|--------------|--------------|----------------|
|                          |                |              |              |                |
| <b>a</b>                 |                |              |              |                |
| <u>Element</u>           | <u>Freedom</u> | <u>Value</u> | <u>Error</u> | <u>Error %</u> |
| Rs                       | Free(+)        | 4.41         | 0.42212      | 9.5719         |
| CPE1-T                   | Free(+)        | 0.00066127   | 4.9462E-05   | 7.4798         |
| CPE1-P                   | Free(+)        | 0.39192      | 0.0080928    | 2.0649         |
| Rct                      | Free(+)        | 314.7        | 37.802       | 12.012         |
| Wo-R                     | Free(+)        | 759.2        | 91.564       | 12.061         |
| Wo-T                     | Free(+)        | 38.16        | 12.484       | 32.715         |
| Wo-P                     | Free(+)        | 0.31004      | 0.034676     | 11.184         |
| Chi-Squared:             |                | 0.0001003    |              |                |
| Weighted Sum of Squares: |                | 0.0031093    |              |                |
|                          |                |              |              |                |
| <b>b</b>                 |                |              |              |                |
| <u>Element</u>           | <u>Freedom</u> | <u>Value</u> | <u>Error</u> | <u>Error %</u> |
| Rs                       | Free(+)        | 13.65        | 0.20341      | 1.4902         |
| CPE1-T                   | Free(+)        | 6.4373E-05   | 3.1084E-06   | 4.8287         |
| CPE1-P                   | Free(+)        | 0.70837      | 0.0060011    | 0.84717        |
| Rct                      | Free(+)        | 277.4        | 6.7006       | 2.4155         |
| Wo-R                     | Free(+)        | 507.5        | 128.66       | 25.352         |
| Wo-T                     | Free(+)        | 25.62        | 16.899       | 65.96          |
| Wo-P                     | Free(+)        | 0.42317      | 0.027        | 6.3804         |
| Chi-Squared:             |                | 0.0006815    |              |                |
| Weighted Sum of Squares: |                | 0.021127     |              |                |
|                          |                |              |              |                |
| <b>c</b>                 |                |              |              |                |
| <u>Element</u>           | <u>Freedom</u> | <u>Value</u> | <u>Error</u> | <u>Error %</u> |
| Rs                       | Free(+)        | 7.776        | 0.12603      | 1.6208         |
| CPE1-T                   | Free(+)        | 0.00024829   | 1.3627E-05   | 5.4883         |
| CPE1-P                   | Free(+)        | 0.61817      | 0.006652     | 1.0761         |
| Rct                      | Free(+)        | 148.3        | 6.484        | 4.3722         |
| Wo-R                     | Free(+)        | 1314         | 1.513E05     | 11514          |
| Wo-T                     | Free(+)        | 426          | 1.3E05       | 30516          |
| Wo-P                     | Free(+)        | 0.37709      | 0.021424     | 5.6814         |
| Chi-Squared:             |                | 0.00038625   |              |                |
| Weighted Sum of Squares: |                | 0.011974     |              |                |

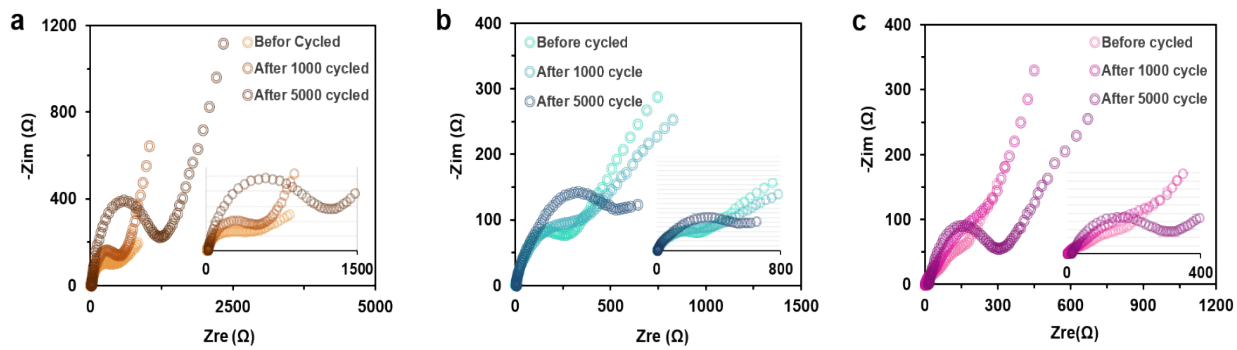

**Figure S7.** Nyquist plot of various full batteries before and after long-term cycle life examination. (a) untreated Zn||PBA, (b) BC@Zn||PBA, and (c) S-PANI@BC@Zn||PBA.

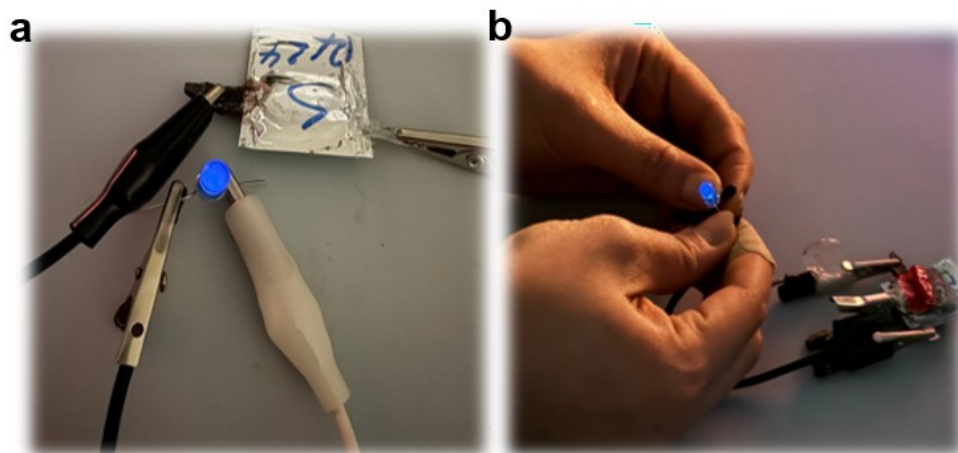

**Figure S8.** Evaluation of full cell ability in lighting up a blue light-emitting diode. (a) before and (b) after 5000 charge/discharge cycles.

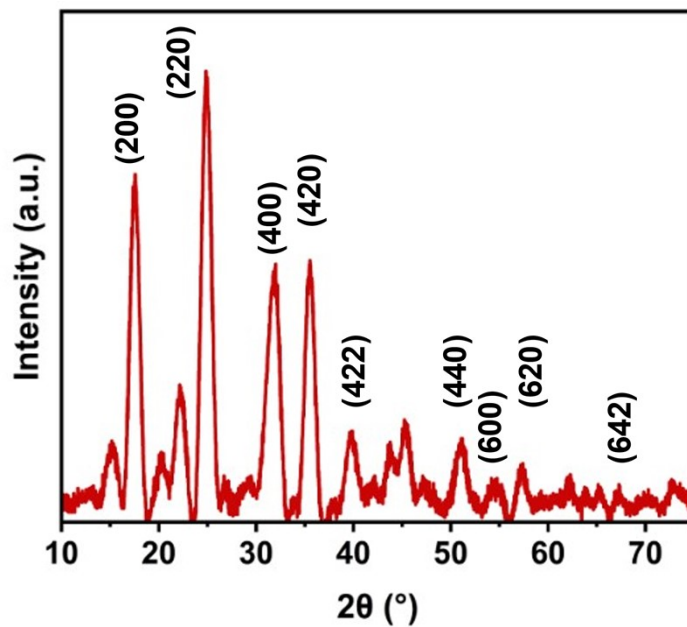

Figure S9. XRD pattern of PBA.

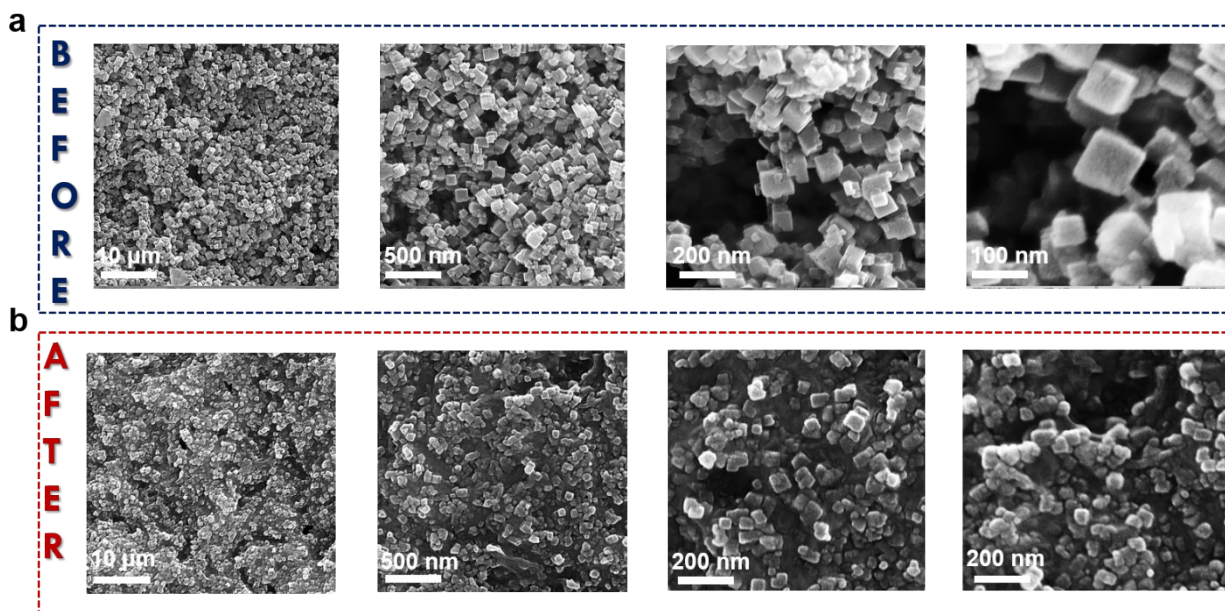

**Figure S10.** FE-SEM images of electroactive PBA after 5000 cycles
